# Supplementary material for: Exploring structural and electronic effects in three isomers of tris{bis(trifluoromethyl)phenyl}borane: towards the combined electrochemical-frustrated Lewis pair activation of H2
Source: Royal Society of Chemistry journal article supplement (doi:10.1039/c5dt01918d), 2015-07-28
Supplement: c5dt01918d1.pdf [file c5dt01918d1.pdf]

## SUPPLEMENTARY INFORMATION

### Exploring Structural and Electronic Effects in Three Isomers of Tris{bis(trifluoromethyl)phenyl}borane: Towards the Combined Electrochemical-Frustrated Lewis Pair Activation of H<sub>2</sub>

Robin J. Blagg, Elliot J. Lawrence, Katie Resner, Vasily S. Oganessian, Thomas J. Herrington,  
Andrew E. Ashley and Gregory G. Wildgoose

|                  |                                                                                                                                          |      |
|------------------|------------------------------------------------------------------------------------------------------------------------------------------|------|
| <b>Figure S1</b> | Crystallographic molecular structure of <b>3</b> (ellipsoids at 50% probability level)                                                   | S2   |
| <b>Figure S2</b> | Experimental and simulated cyclic voltammograms for the reduction of B(C <sub>6</sub> F <sub>5</sub> ) <sub>3</sub>                      | S3   |
| <b>Table S1</b>  | Relative molecular energies and orbital energies                                                                                         | S3   |
| <b>Figure S3</b> | Highest occupied molecular orbitals (HOMOs) for (a) <b>1</b> , (b) <b>2</b> , and (c) <b>3</b>                                           | S4   |
| <b>Figure S4</b> | Singularly occupied molecular orbitals (SOMOs) for (a) <b>1</b> <sup>-</sup> , (b) <b>2</b> <sup>-</sup> , and (c) <b>3</b> <sup>-</sup> | S4   |
| <b>Figure S5</b> | Lowest unoccupied molecular orbitals (LUMOs) for (a) <b>1</b> <sup>-</sup> , (b) <b>2</b> <sup>-</sup> , and (c) <b>3</b> <sup>-</sup>   | S4   |
| <b>Figure S6</b> | Calculated Mulliken atomic charges for (a) <b>1</b> , (b) <b>2</b> , and (c) <b>3</b>                                                    | S5-6 |

**Synthesis of authentic [(<sup>t</sup>Bu)<sub>3</sub>PH][HB{(CF<sub>3</sub>)<sub>2</sub>C<sub>6</sub>H<sub>3</sub>}** Equimolar amounts of Na[**2**-H] or Na[**3**-H] and [(<sup>t</sup>Bu)<sub>3</sub>PH]Cl (synthesised from P(<sup>t</sup>Bu)<sub>3</sub> and HCl in Et<sub>2</sub>O) are combined and dissolved in CD<sub>2</sub>Cl<sub>2</sub>. Colourless precipitate (NaCl) rapidly forms and NMR spectra obtained of the solution are consistent with [(<sup>t</sup>Bu)<sub>3</sub>PH][**2**-H] and [(<sup>t</sup>Bu)<sub>3</sub>PH][**3**-H] respectively; the spectra are unchanged over a 66 hour period.

# SUPPLEMENTARY INFORMATION

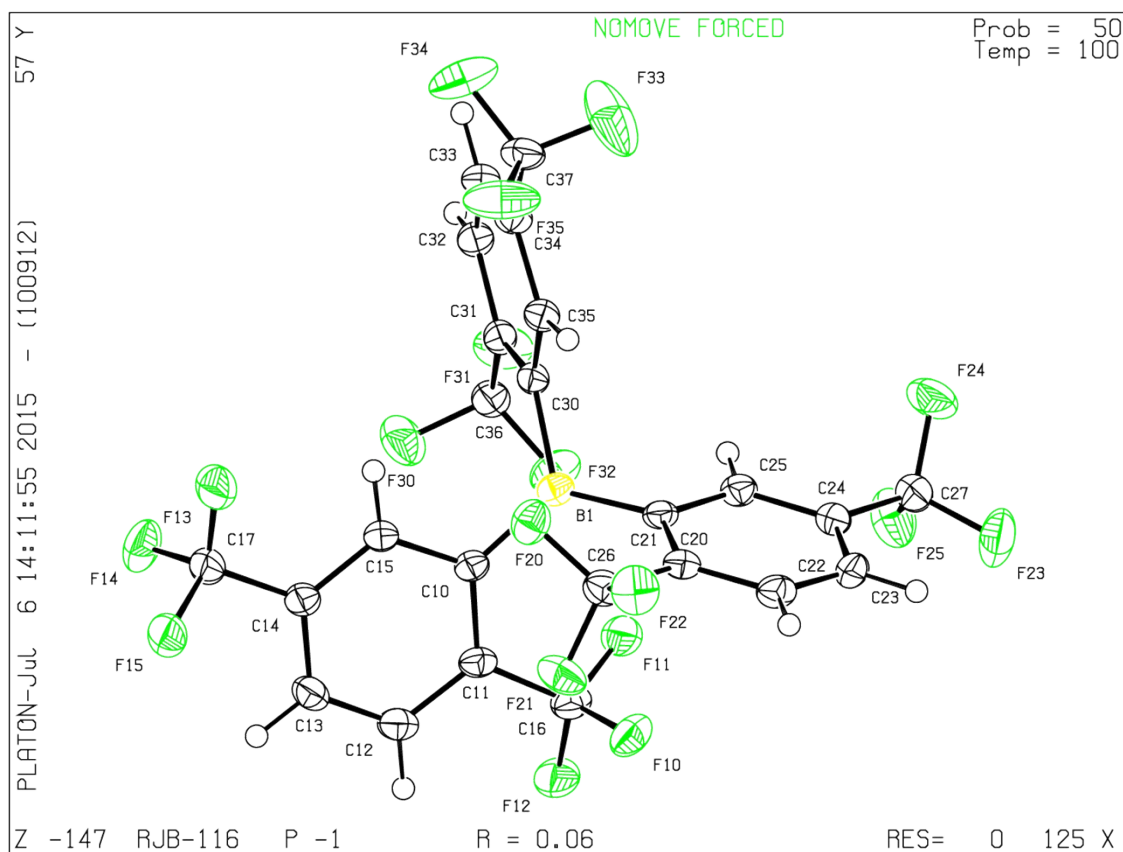

**Figure S1** Crystallographic molecular structure of **3** (ellipsoids at 50% probability level)

# SUPPLEMENTARY INFORMATION

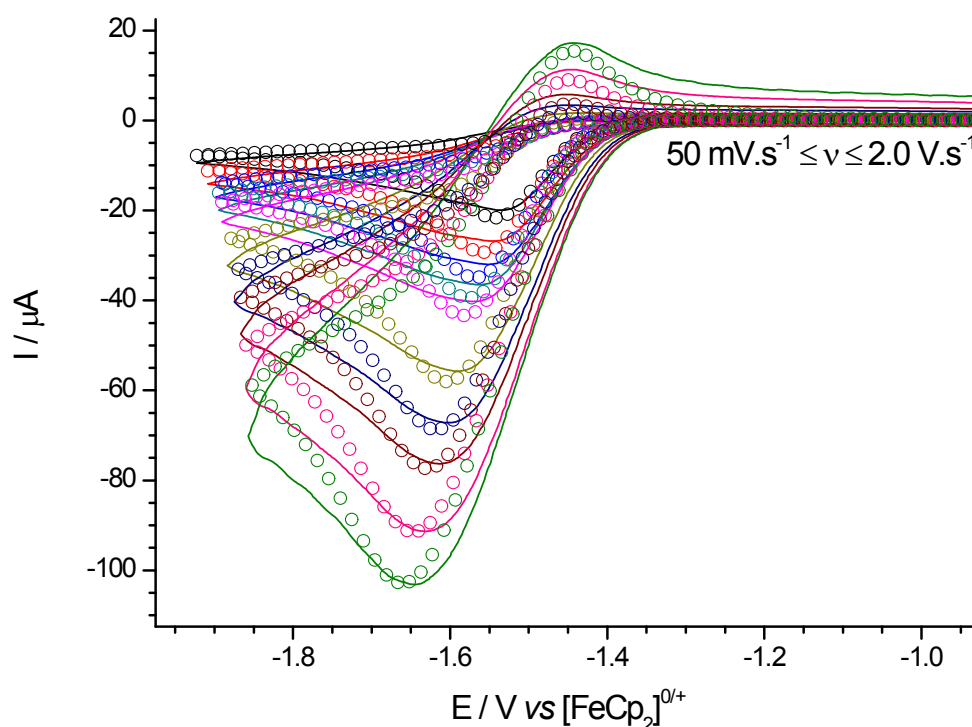

**Figure S2** Experimental (line) and simulated (open circles) cyclic voltammograms for the reduction of  $B(C_6F_5)_3$

WE = glassy carbon disc; CE = platinum wire; *pseudo*-RE = silver wire;  $CH_2Cl_2/[nBu_4N][B(C_6F_5)_4]$

Simulated using an *EC*-mechanism with:

$$E^0 = -1.518 \text{ V vs } [FeCp_2]^{0/+}; \alpha = 0.379; k^0 = 1.45 \times 10^{-2} \text{ cm.s}^{-1}; k_f = 9.2 \text{ s}^{-1};$$

$D\{B(C_6F_5)_3\} = D\{B(C_6F_5)_3\}^- = 0.85 \times 10^{-5} \text{ cm}^2.\text{s}^{-1}$  diffusion constant obtained via  $^{19}F$  DOSY NMR spectroscopy

**Table S1** Relative ground state molecular energies and orbital energies

|                                      | E / $\text{kJ.mol}^{-1}$ <sup>a</sup> | E (HOMO) / Ha | E (SOMO) / Ha | E (LUMO) / Ha |
|--------------------------------------|---------------------------------------|---------------|---------------|---------------|
| $B\{3,5-(CF_3)_2C_6H_3\}_3$ <b>1</b> | -46.0                                 | -0.31412      | -             | -0.13356      |
| $B\{2,4-(CF_3)_2C_6H_3\}_3$ <b>2</b> | 0.0                                   | -0.30144      | -             | -0.12319      |
| $B\{2,5-(CF_3)_2C_6H_3\}_3$ <b>3</b> | -3.1                                  | -0.29809      | -             | -0.11971      |
| $[B\{3,5-(CF_3)_2C_6H_3\}_3]^{1-}$   | -280.3                                | -             | -0.04756      | +0.02745      |
| $[B\{2,4-(CF_3)_2C_6H_3\}_3]^{2-}$   | -221.8                                | -             | -0.04618      | -0.02729      |
| $[B\{2,5-(CF_3)_2C_6H_3\}_3]^{3-}$   | -213.4                                | -             | -0.03962      | +0.02719      |

<sup>a</sup> Total molecular energies are all reported relative to **2**.

## SUPPLEMENTARY INFORMATION

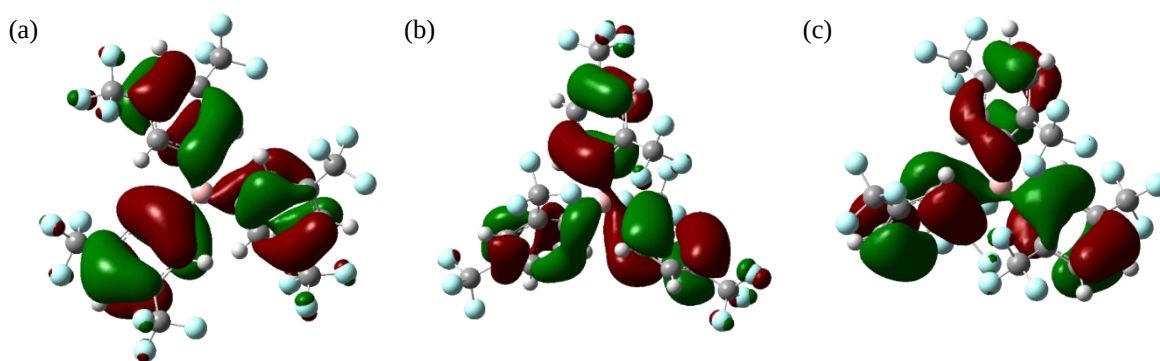

**Figure S3** Highest occupied molecular orbitals (HOMOs) for (a) **1**, (b) **2**, and (c) **3**

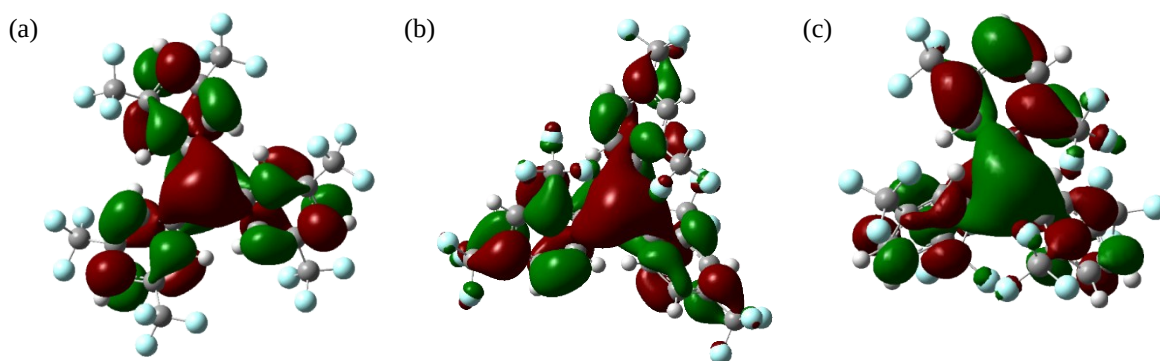

**Figure S4** Singly occupied molecular orbitals (SOMOs) for (a) **1<sup>-</sup>**, (b) **2<sup>-</sup>**, and (c) **3<sup>-</sup>**

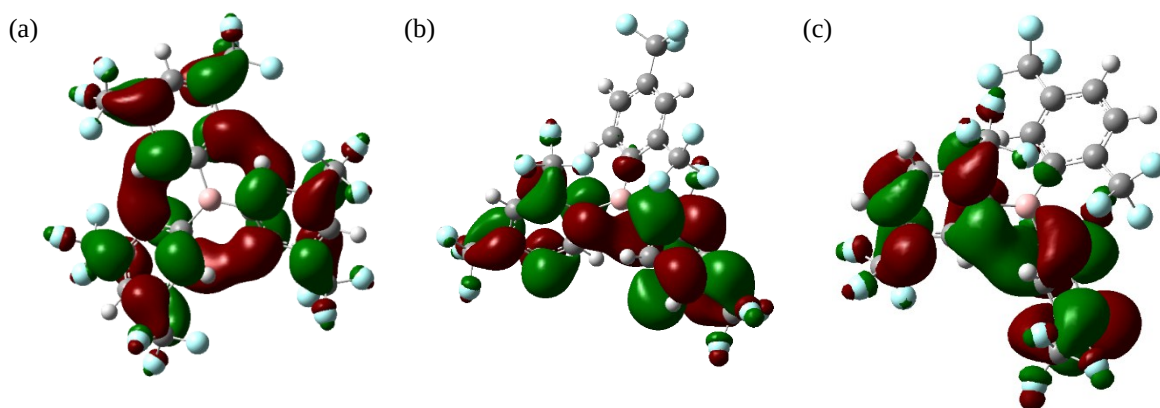

**Figure S5** Lowest unoccupied molecular orbitals (LUMOs) for (a) **1<sup>-</sup>**, (b) **2<sup>-</sup>**, and (c) **3<sup>-</sup>**

# SUPPLEMENTARY INFORMATION

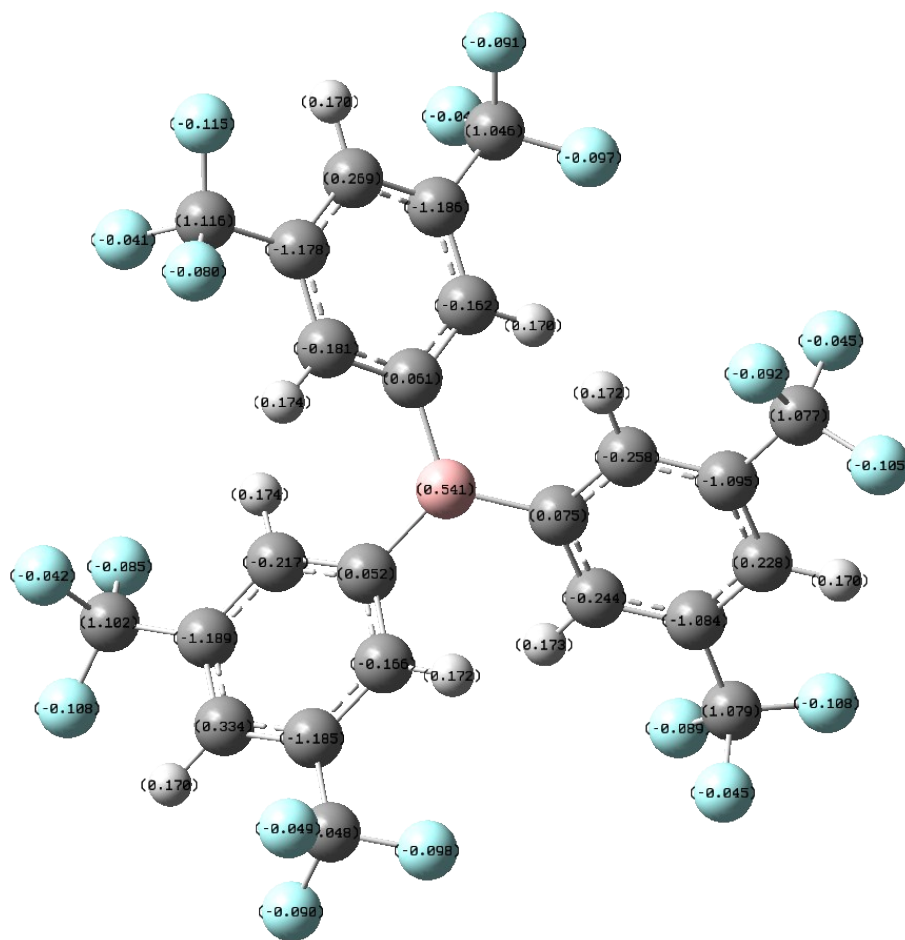

**Figure S6a** Calculated Mulliken atomic charges for  $B\{3,5-(CF_3)_2C_6H_3\}_3$  **1**

# SUPPLEMENTARY INFORMATION

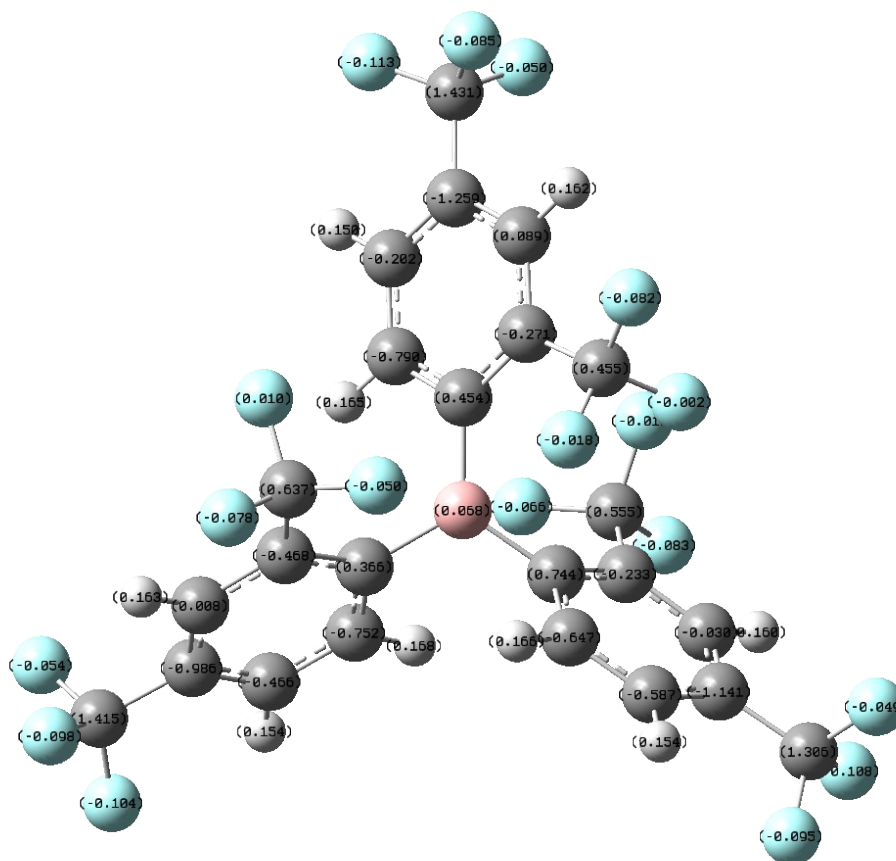

**Figure S6b** Calculated Mulliken atomic charges for B{2,4-(CF<sub>3</sub>)<sub>2</sub>C<sub>6</sub>H<sub>3</sub>}<sub>3</sub> 2

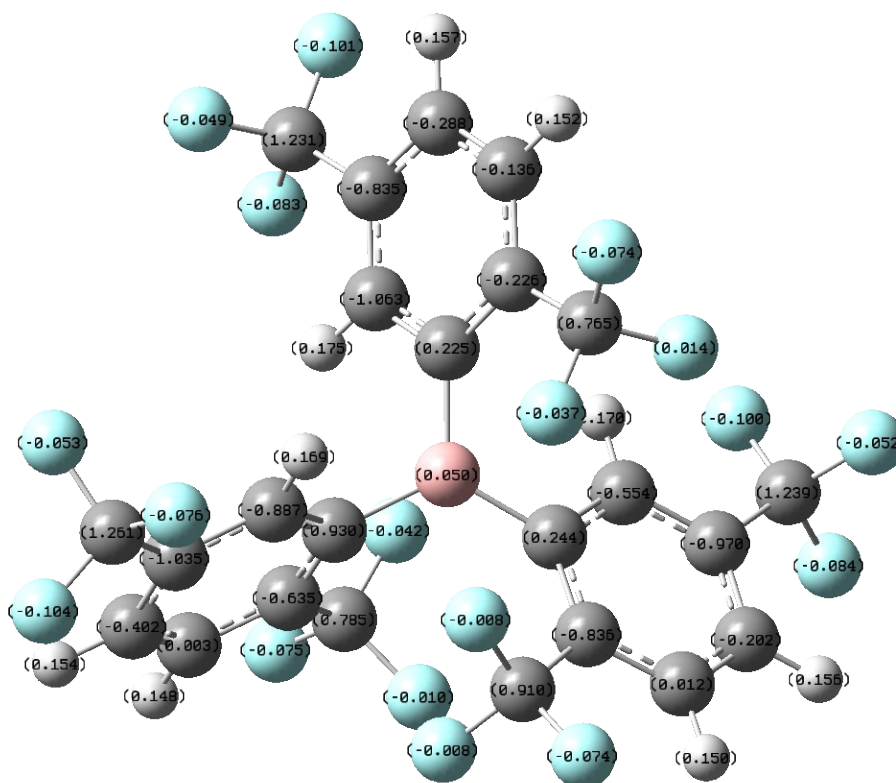

**Figure S6c** Calculated Mulliken atomic charges for B{2,5-(CF<sub>3</sub>)<sub>2</sub>C<sub>6</sub>H<sub>3</sub>}<sub>3</sub> 3
